# Supplementary material
Source: publisher figshare collection journal article supplement (https://acs.figshare.com/ndownloader/files/4168402)
Supplement: Supplementary file 1 [file 4168402]

## Supporting Information

### Pyridine is an organocatalyst for the reductive ozonolysis of alkenes

Rachel A. Willand-Charnley, Thomas J. Fisher, Bradley Johnson and Patrick H. Dussault\*  
Department of Chemistry, University of Nebraska-Lincoln  
Lincoln NE 68588-0304, USA; e-mail: [pdussault1@unl.edu](mailto:pdussault1@unl.edu).

#### Table of Contents

|                                                                                            |       |
|--------------------------------------------------------------------------------------------|-------|
| Abbreviations                                                                              | 2     |
| References for Substrate Preparation                                                       | 2     |
| General Experimental Procedure                                                             | 2     |
| Sample Ozonolysis Procedures                                                               | 2     |
| Ozonolysis Products                                                                        |       |
| 9-Acetoxy-nonanal ( <b>2b</b> )                                                            | 3     |
| Methyl-9-oxononanoate; Nonanal                                                             |       |
| 5-Acetyl-2-methylcyclohexanone                                                             |       |
| 4-(1,1-Dimethylethyl) cyclohexanone ( <b>3b</b> )                                          |       |
| 5-Oxohexanal                                                                               |       |
| 6-Oxoheptanal                                                                              |       |
| Octanal ( <b>1b</b> )                                                                      |       |
| 2-Phenylpropanal ( <b>4b</b> )                                                             |       |
| Nopinone                                                                                   |       |
| 6,6-Dimethylspiro[bicyclo[3.1.1]heptane-2,3'-[1,2,4]trioxolane]                            |       |
| Tandem ozonolysis/Grignard addition (procedure)                                            | 3     |
| Decan-2-ol; 1-Phenyldecan-1-ol                                                             |       |
| <sup>1</sup> H NMR assay of reaction in CD <sub>2</sub> Cl <sub>2</sub>                    | 4     |
| <sup>1</sup> H NMR spectra of ozonolyses with/without pyridine after a fixed reaction time | 5-6   |
| <sup>1</sup> H NMR spectra of reaction products.                                           | 7-22  |
| 9-Acetoxy-nonanal ( <b>2b</b> )                                                            | 7     |
| Nonanal                                                                                    | 8     |
| 5-Acetyl-2-methylcyclohexanone                                                             | 9     |
| 4-(1,1-Dimethylethyl) cyclohexanone ( <b>3b</b> )                                          | 10    |
| 5-Oxohexanal                                                                               | 11    |
| 6-Oxoheptanal                                                                              | 12    |
| Octanal ( <b>1b</b> )                                                                      | 13    |
| 2-Phenylpropanal ( <b>4b</b> )                                                             | 14    |
| Nopinone                                                                                   | 15    |
| 6,6-Dimethylspiro[bicyclo[3.1.1]heptane-2,3'-[1,2,4]trioxolane]                            | 16    |
| Methyl-9-oxononanoate                                                                      | 17    |
| Decan-2-ol                                                                                 | 18    |
| 1-Phenyldecan-1-ol                                                                         | 19    |
| 2-(3-Butenyl-1-yl) pyridine ( <sup>1</sup> H, <sup>13</sup> C, IR)                         | 20-22 |
| References                                                                                 | 23    |

Abbreviations: EA = ethyl acetate; Hex = hexane; RBF = round bottom flask.

Substrates: Decene, methyl oleate, dihydrocarvone, methylcyclopentene, methylcyclohexene, ethyl vinyl ether, and beta pinene were used as obtained from commercial sources. 9-Acetoxy-1-decene,<sup>1</sup> 4-*t*-butyl-1-methylenecyclohexane,<sup>2</sup> 4-*t*-butyl-1-methoxymethylenecyclohexane (**3a**),<sup>3</sup> 3-phenyl-1-methoxy-1-butene (**4a**),<sup>4</sup> 1-methoxy-1-nonene (**1a**),<sup>5</sup> 9-acetoxy-1-methoxy-1-decene (**2a**),<sup>6</sup> and 2-(3-butenyl)pyridine were prepared through reported procedures.<sup>7</sup>

General Experimental Conditions: All reagents and solvents were used as supplied commercially, except CH<sub>2</sub>Cl<sub>2</sub>, which was distilled from CaH<sub>2</sub>. Thin layer chromatography (TLC) was performed on 0.25 mm hard-layer silica G plates containing a fluorescent indicator. Developed TLC plates were visualized with a hand-held UV lamp or by staining: 1% ceric sulfate / 10% ammonium molybdate in 10% H<sub>2</sub>SO<sub>4</sub> (general stain, after charring); 1% *N,N'*-dimethyl-*p*-phenylenediamine in 1:20:100 acetic acid/water/methanol (specific for peroxides: hydroperoxides and some ozonides give a pinkish color upon dipping; nearly all peroxides will give a reddish-pink coloration upon mild heating).<sup>8</sup> Unless noted, NMR spectra were acquired in CDCl<sub>3</sub>. IR spectra were recorded as neat films on a ZrSe crystal with selected absorbances reported in cm<sup>-1</sup>.

Ozonolysis in the presence of pyridine: The alkene substrate (1-3 mmol) and dry pyridine (3-9 mmol) were dissolved in dry CH<sub>2</sub>Cl<sub>2</sub> (15-20 ml) in a flame-dried flask under N<sub>2</sub>. The solution was cooled to -78 °C, at which point a stream of O<sub>3</sub>/O<sub>2</sub> (~ 1 mmol/min of O<sub>3</sub>) was introduced through a disposable pipet for a period that varied with the amount of alkene (~ 1 min/mmol). Once complete, the reaction was sparged with O<sub>2</sub> and then N<sub>2</sub>. The crude reaction mixture was diluted with CH<sub>2</sub>Cl<sub>2</sub> (10 ml) and sat. aq. NaHCO<sub>3</sub> (15 ml). The aqueous layer was extracted (3 x 5 mL) with CH<sub>2</sub>Cl<sub>2</sub> and the combined organic layers were dried over Na<sub>2</sub>SO<sub>4</sub> and filtered through a cotton plug. The residue obtained upon concentration was purified via flash chromatography with ethyl acetate/hexanes to furnish the aldehyde or ketone.

*Preparative scale:* Application on a 10 mmol scale resulted in similar yields (e.g., ozonolysis of dihydrocarvone to 5-acetyl-2-methylcyclohexanone was achieved in 80% isolated yield).

*Nonaqueous work-up:* In lieu of an aqueous work-up, the sparged reaction solution resulting from ozonolysis could be partially concentrated and then directly loaded onto a silica column and eluted with ethyl acetate/hexane. Yields were comparable to the extractive workup. For example ozonolysis of 9-decenyl acetate followed by concentration and chromatography furnished 9-acetoxynonanal in 87% yield vs. the 80% yield (Table 1) obtained with an aqueous workup.

Substrates prepared via ozonolysis: The following were prepared according to the experimental procedure. All compounds afforded spectral data that was identical to literature values.

**5-Acetyl-2-methylcyclohexanone** [56893-77-7].<sup>9</sup> R<sub>f</sub> = 0.48 (10% EA/hex); (RWC-1-54)

**5-Oxohexanal** [ 505-03-3].<sup>10</sup> R<sub>f</sub> = 0.33 (30% EA/hex). (RWC-1-71)

**6-Oxoheptanal** [19480-04-7].<sup>11</sup> R<sub>f</sub> = 0.33 (30% EA/hex). (RWC-1-70)

**Octanal (1b)** [124-13-0].<sup>12</sup>  $R_f = 0.7$  (10% EA/hex). (RWC-3-46)

**9-Acetoxy-nonanal (2b)** [29541-97-7].<sup>9</sup>  $R_f = 0.14$  (10% EA/hex). (RWC-1-43)

**Nonanal** [124-19-6].<sup>13</sup>  $R_f = 0.6$  (10% EA/hex). (RWC-1-43)

**Methyl-9-oxononanoate** [1931-63-1].  $R_f = 0.7$  (10% EA/hex) (RWC-1-52)

**4-(1,1-Dimethylethyl cyclohexanone (3b)** [98-53-3].<sup>14</sup>  $R_f = 0.47$  (10% EA/hex). (RWC-2-31)

**2-Phenylpropanal (4b)** [1335-10-0].<sup>15</sup>  $R_f = 0.6$  (10% EA/hex). (RWC-1-90)

**Nopinone** [38651-65-9].<sup>16</sup>  $R_f = 0.33$  (10% EA/hex). (RWC- 3-10)

**6,6-Dimethylspiro[bicyclo[3.1.1]heptane-2,3'-[1,2,4]trioxolane]** [pinene ozonide, 201472-62-0].<sup>17</sup>  $R_f = 0.8$  (10% EA/hex) (RWC-1-77)

One-pot ozonolysis/organometallic addition: A -78 °C solution of alkene and pyridine in CH<sub>2</sub>Cl<sub>2</sub> was subjected to ozonolysis as described above. Once the cleavage of alkene was complete (based upon reaction time and/or TLC analysis), the reaction was sparged with oxygen and the flask was capped with a septa. The internal atmosphere was removed under vacuum and replaced with dry nitrogen. The flask was recooled to 0 °C, whereupon a stoichiometric amount of phenyl or methyl magnesium bromide (nominally 1M solutions in THF) was added. The reaction was monitored by TLC and, when complete, was quenched by dropwise addition of water followed by a few drops of 6M HCl. The mixture was diluted with a volume of saturated aq. NH<sub>4</sub>Cl and the separated aqueous layer was extracted with CH<sub>2</sub>Cl<sub>2</sub> (3 x). The remainder of the work-up was as for the ozonolysis procedure described above. The combined organic layers were dried and concentrated as described previously.

**Decan-2-ol** [1120-0605].<sup>18</sup>  $R_f = 0.20$  (10% EA/hex). (RWC-2-82)

**1-Phenyldecan-1-ol** [256378-51-5].<sup>19</sup>  $R_f = 0.26$  (10% EA/hex). (RWC-2-95)

## NMR analysis of reaction in CD<sub>2</sub>Cl<sub>2</sub>

1D Proton

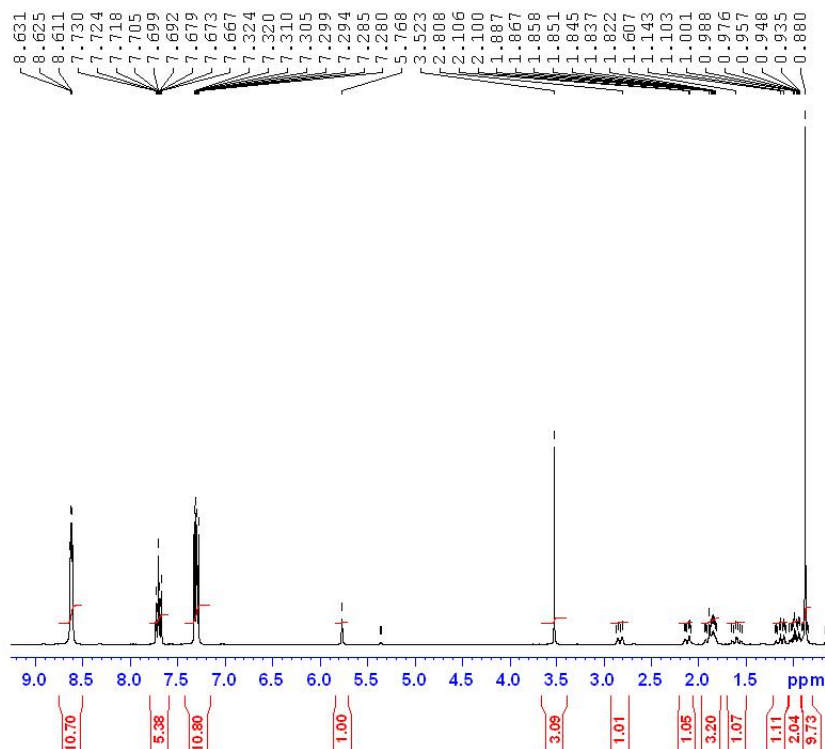

1D Proton

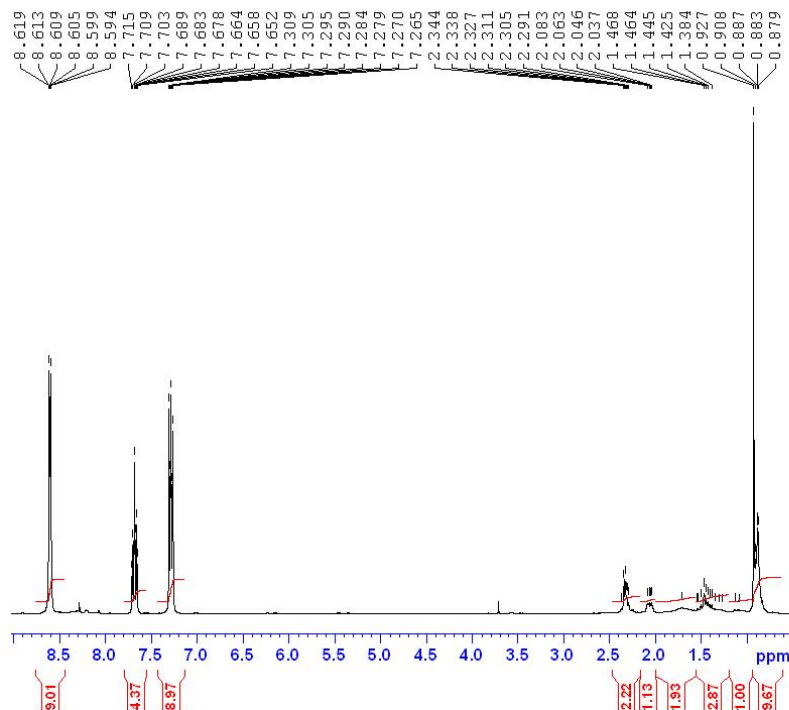

1D Proton NMR

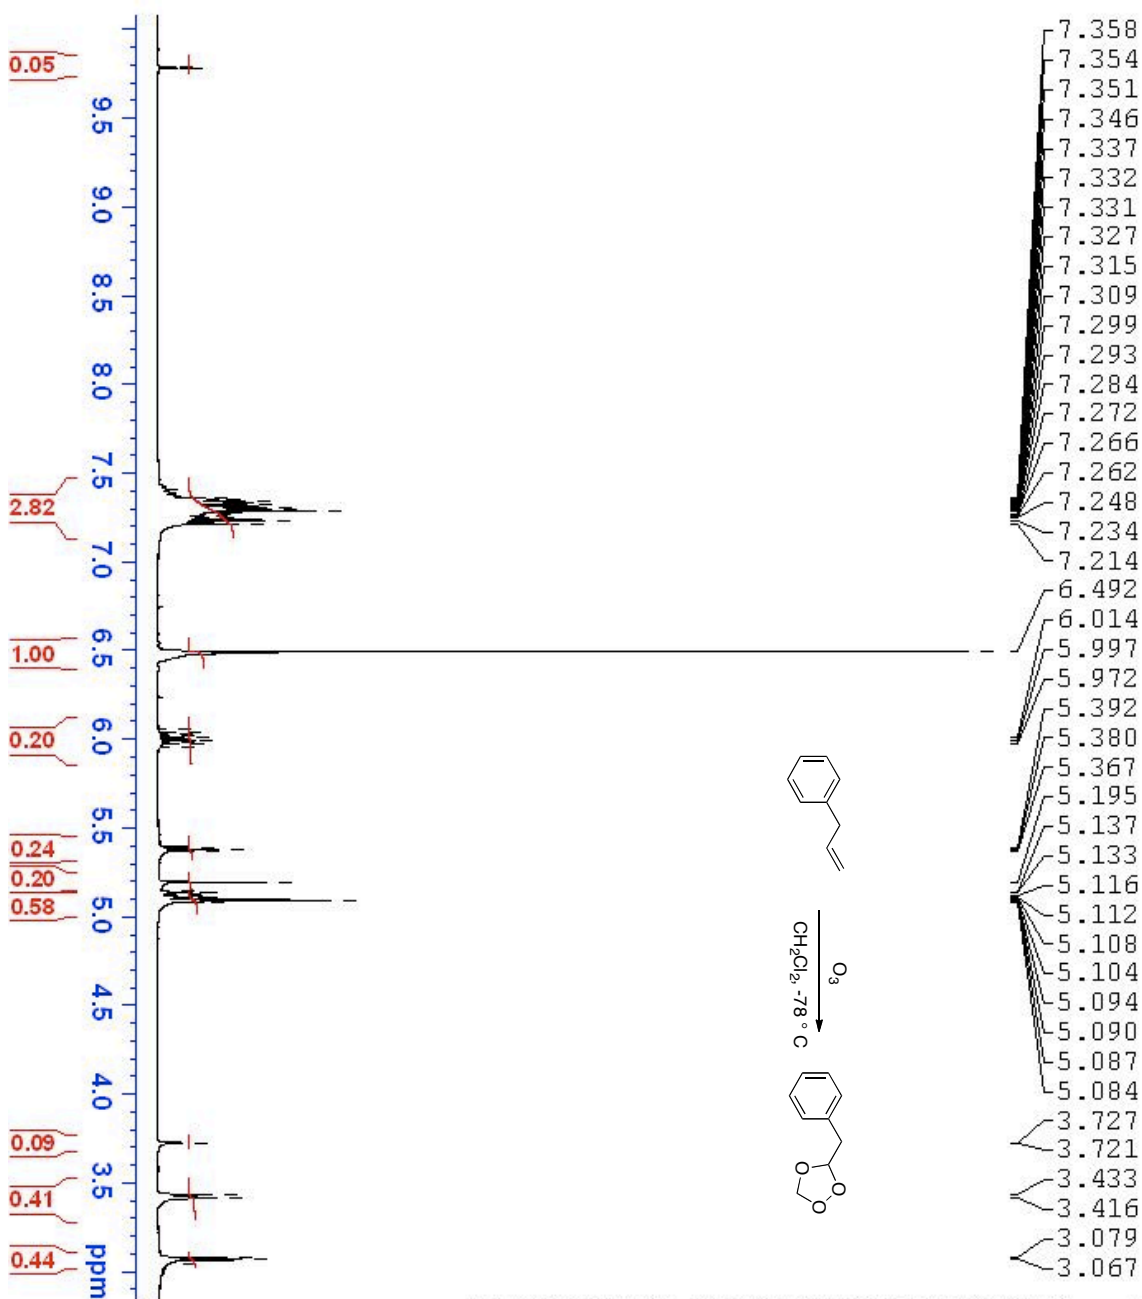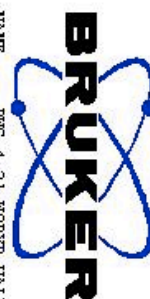

NAME RUC-4-31-WOPYR-HALFTIME  
 EXPNO 1  
 PROCNO 1  
 Date\_ 20120306  
 Time 10.30  
 INSTRUM spect  
 PROBHD 5 mm QNP 1H/13  
 PULPROG zg30  
 TD 65536  
 SOLVENT CDCl3  
 NS 16  
 DS 2  
 SWH 8278.146 Hz  
 FIDRES 0.126314 Hz  
 AQ 3.9584243 sec  
 RG 228.1  
 DW 60.400 usec  
 DE 6.50 usec  
 TE 292.9 K  
 D1 1.00000000 sec  
 TD0 1

===== CHANNEL f1 =====  
 NUCL 1H  
 P1 10.00 usec  
 PL1 -4.00 dB  
 SFOL 400.1324710 MHz  
 SI 32768  
 SF 400.1300000 MHz  
 WDW EM  
 SSB 0  
 LB 0.30 Hz  
 GB 0  
 PC 1.00

1D Proton NMR

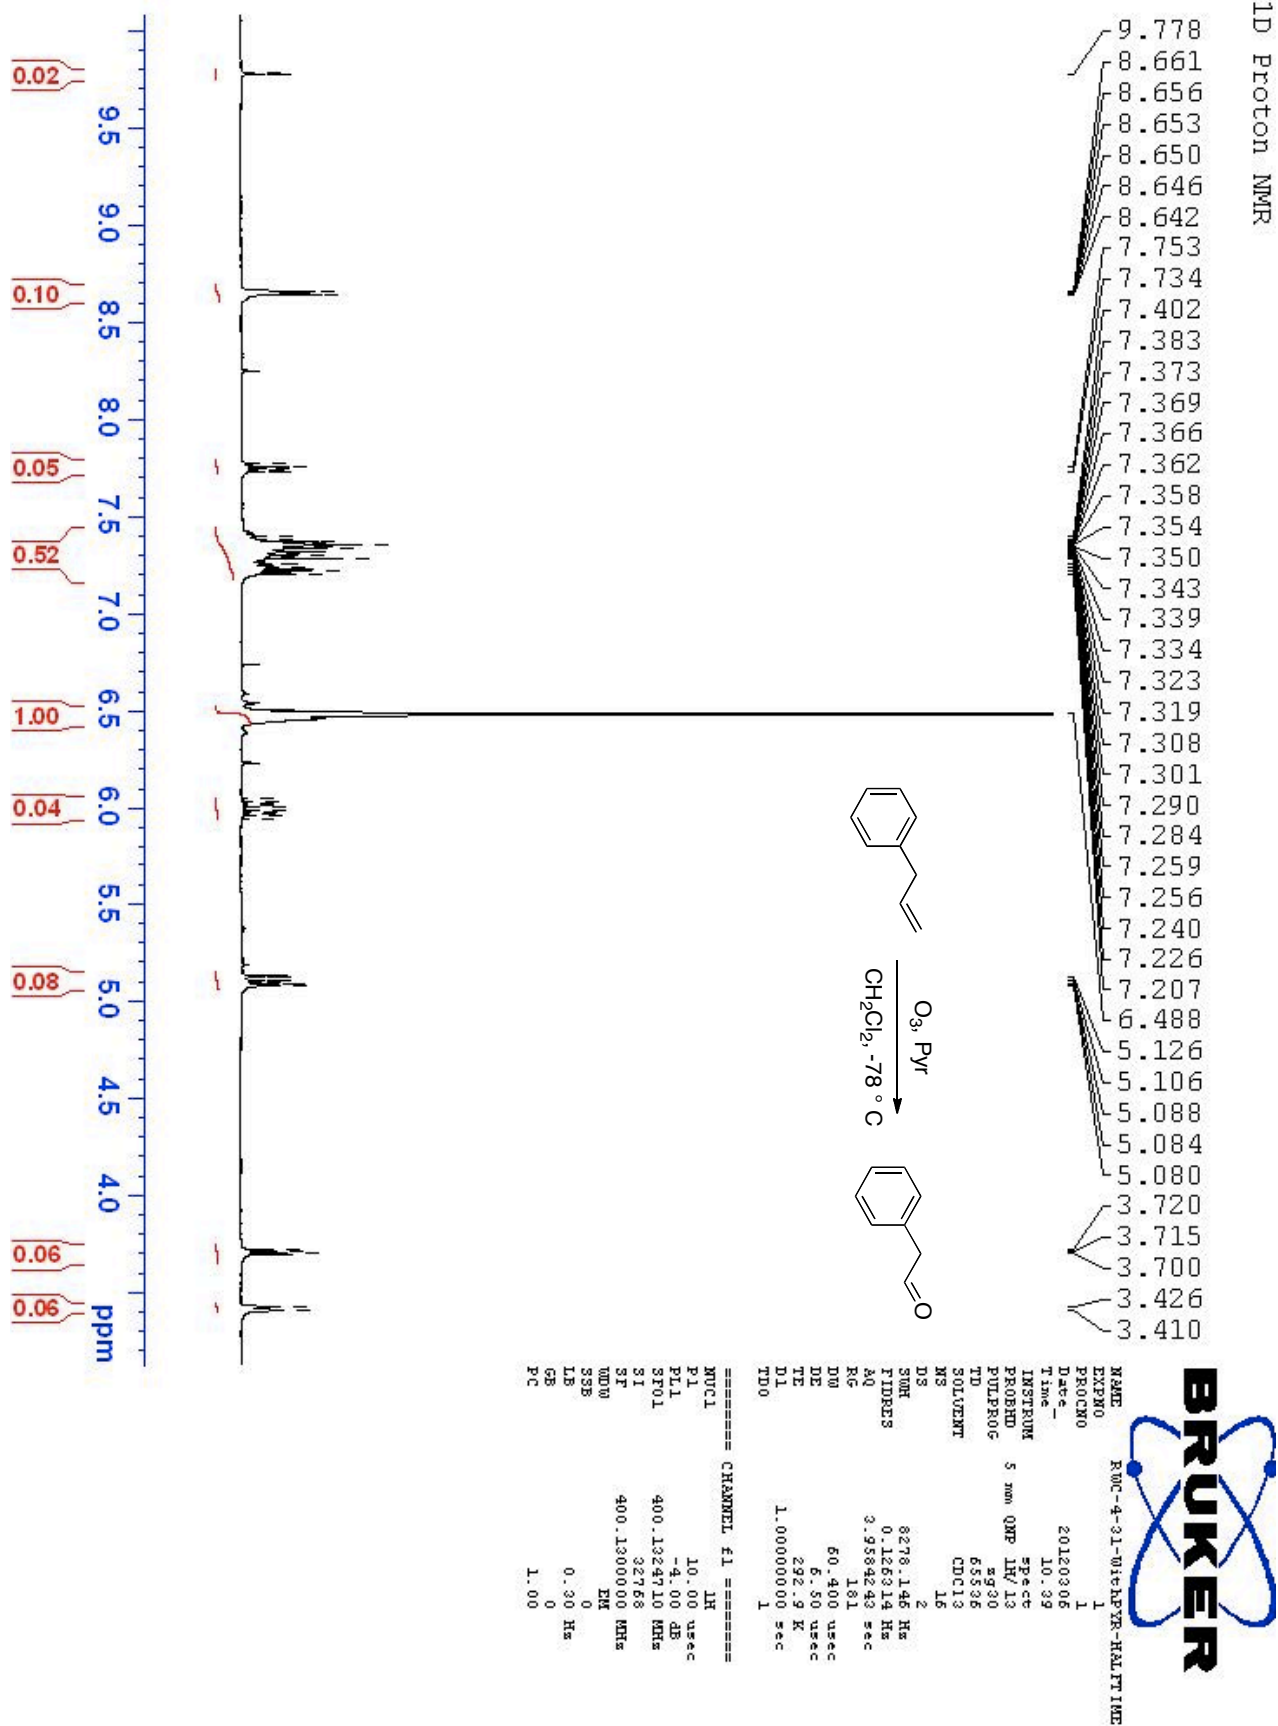

Delivery of a fixed amount of ozone to an alkene in the presence of pyridine.

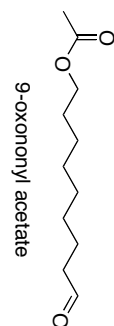

2b

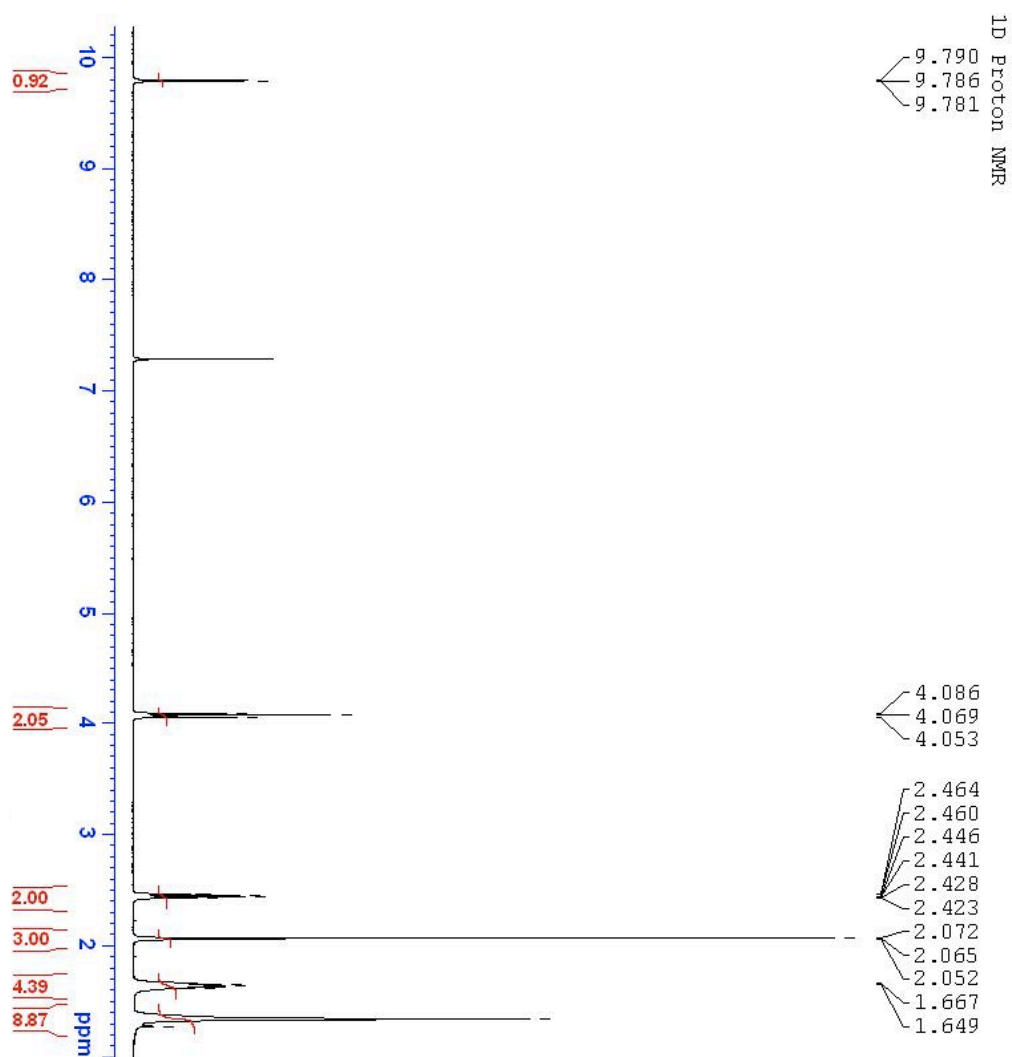

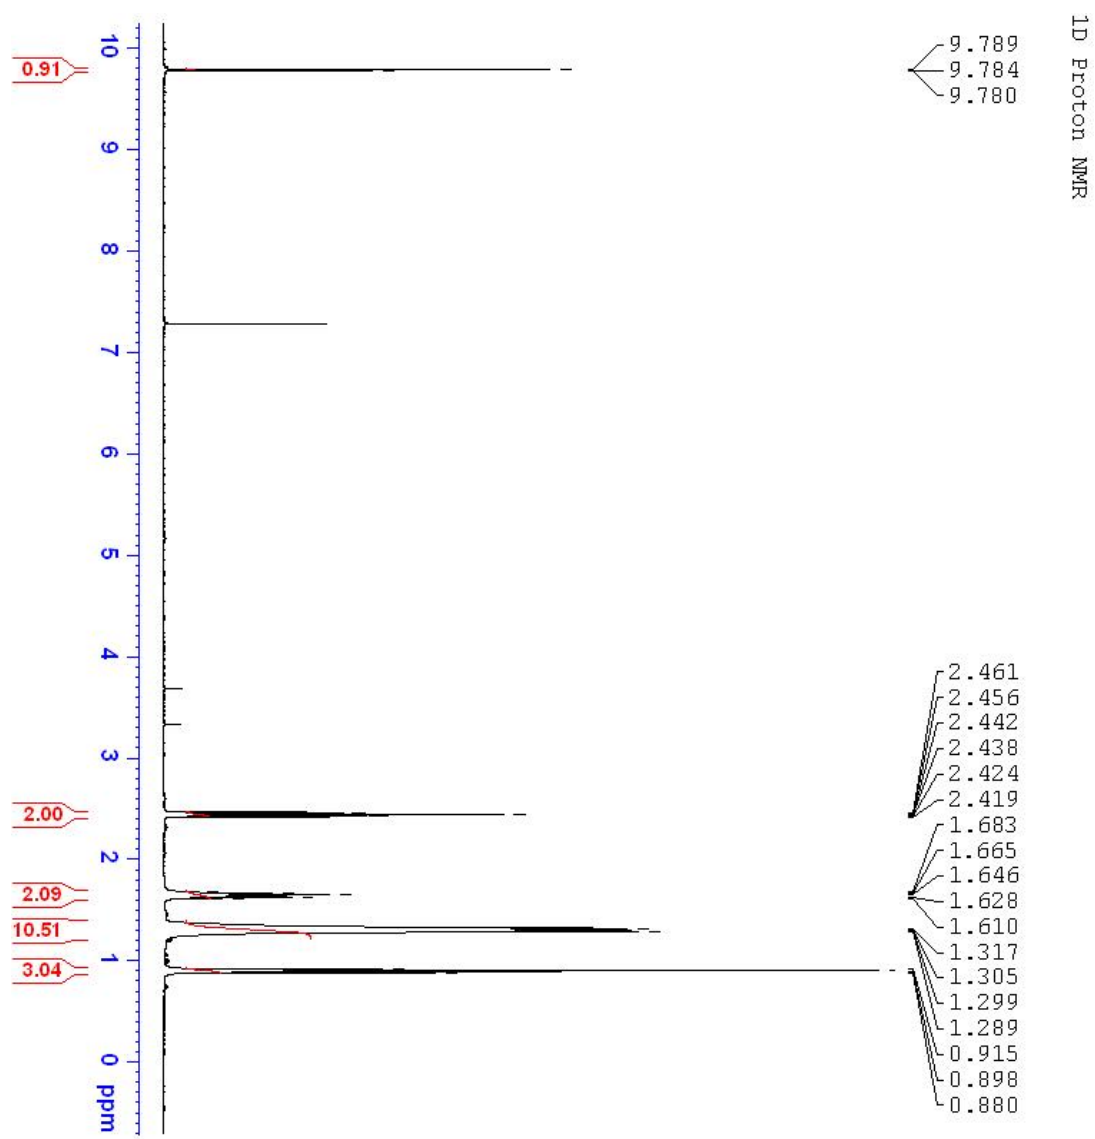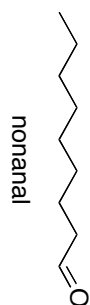



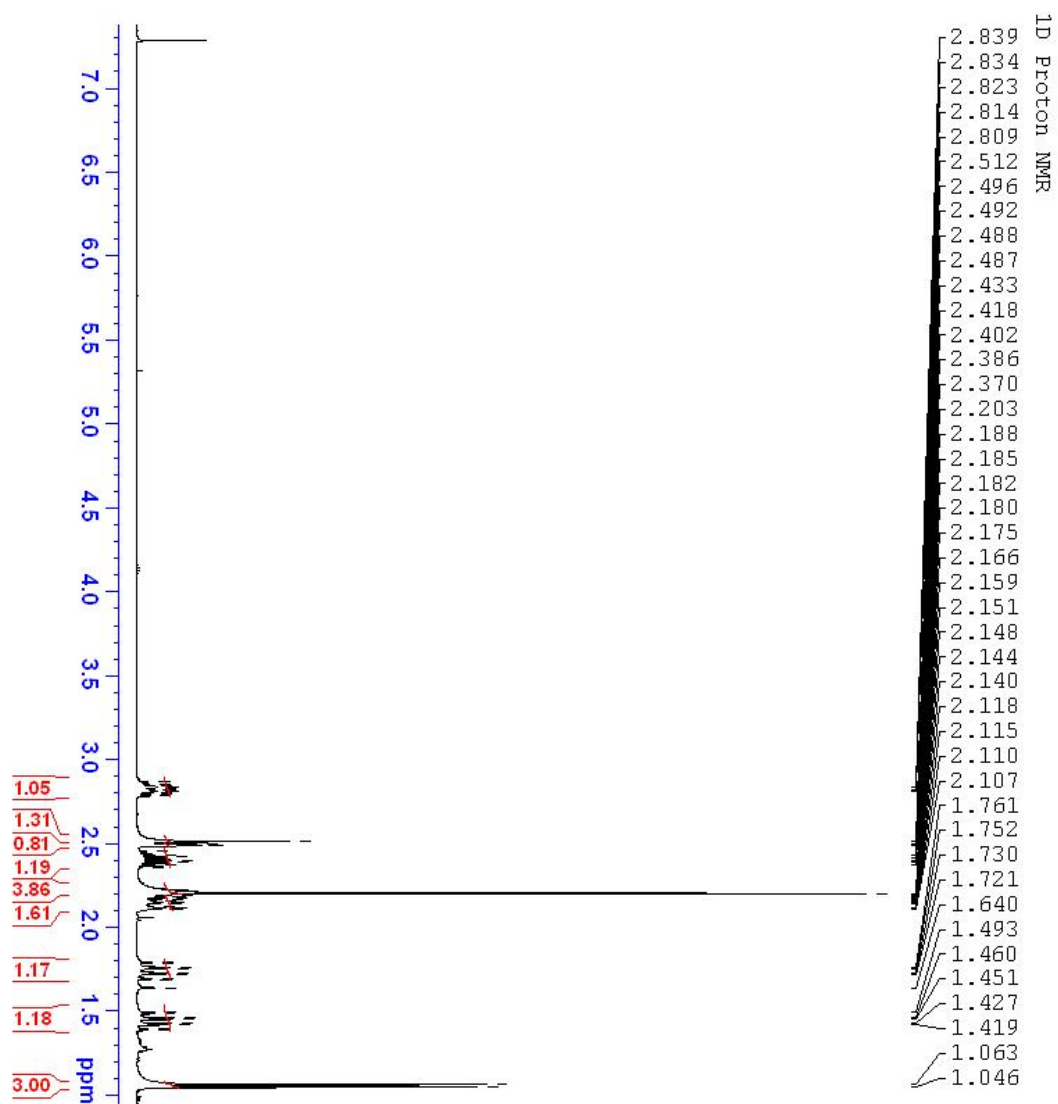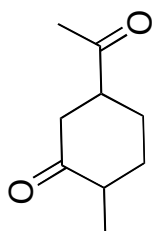

5-acetyl-2-methylcyclohexanone

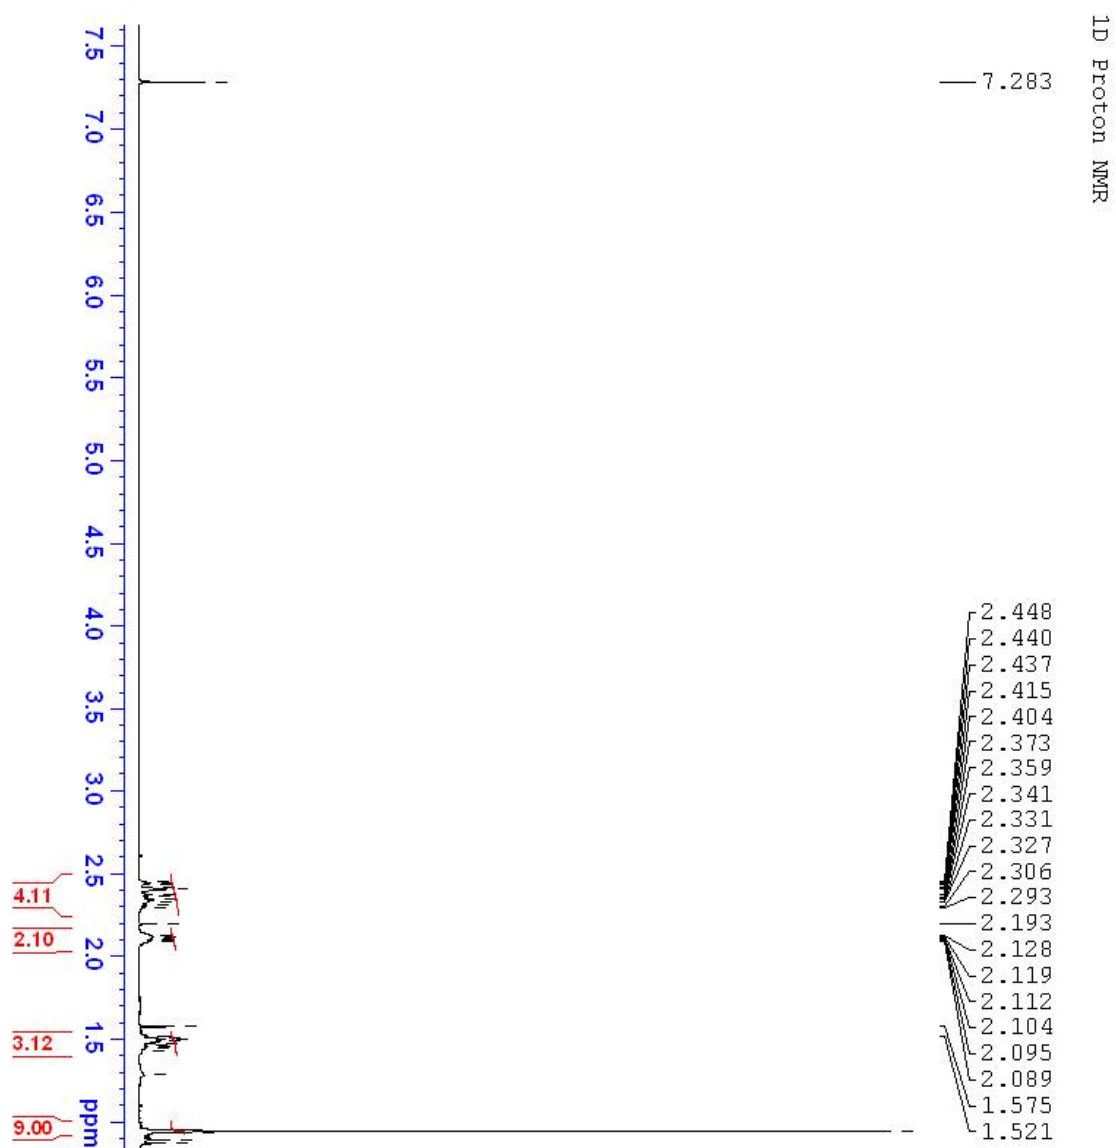

4-(*tert*-butyl)cyclohexanone

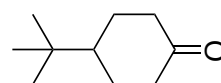

3b

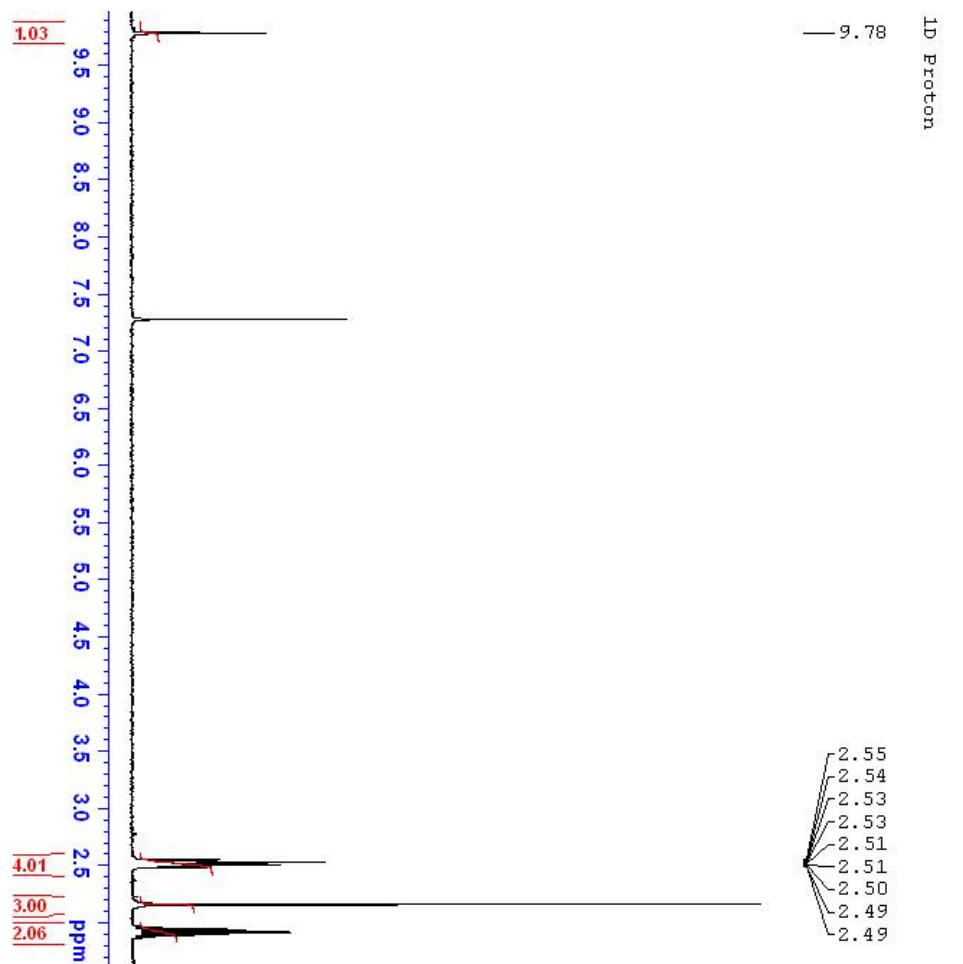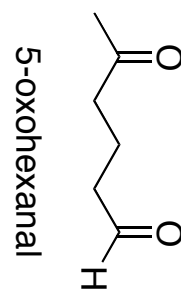

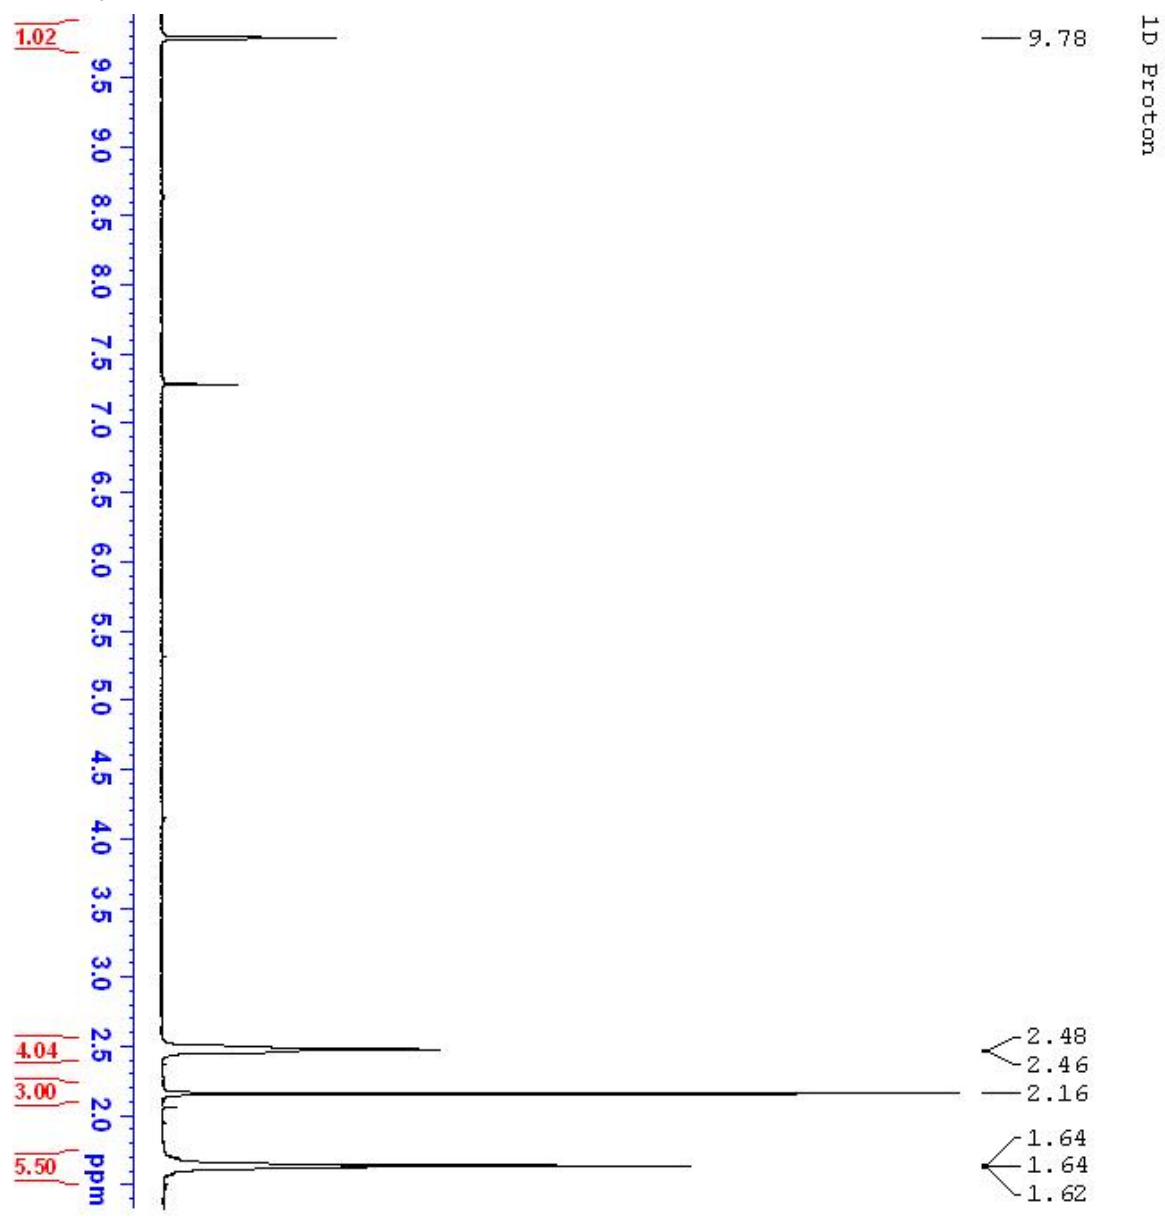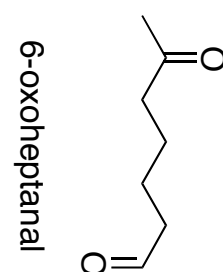

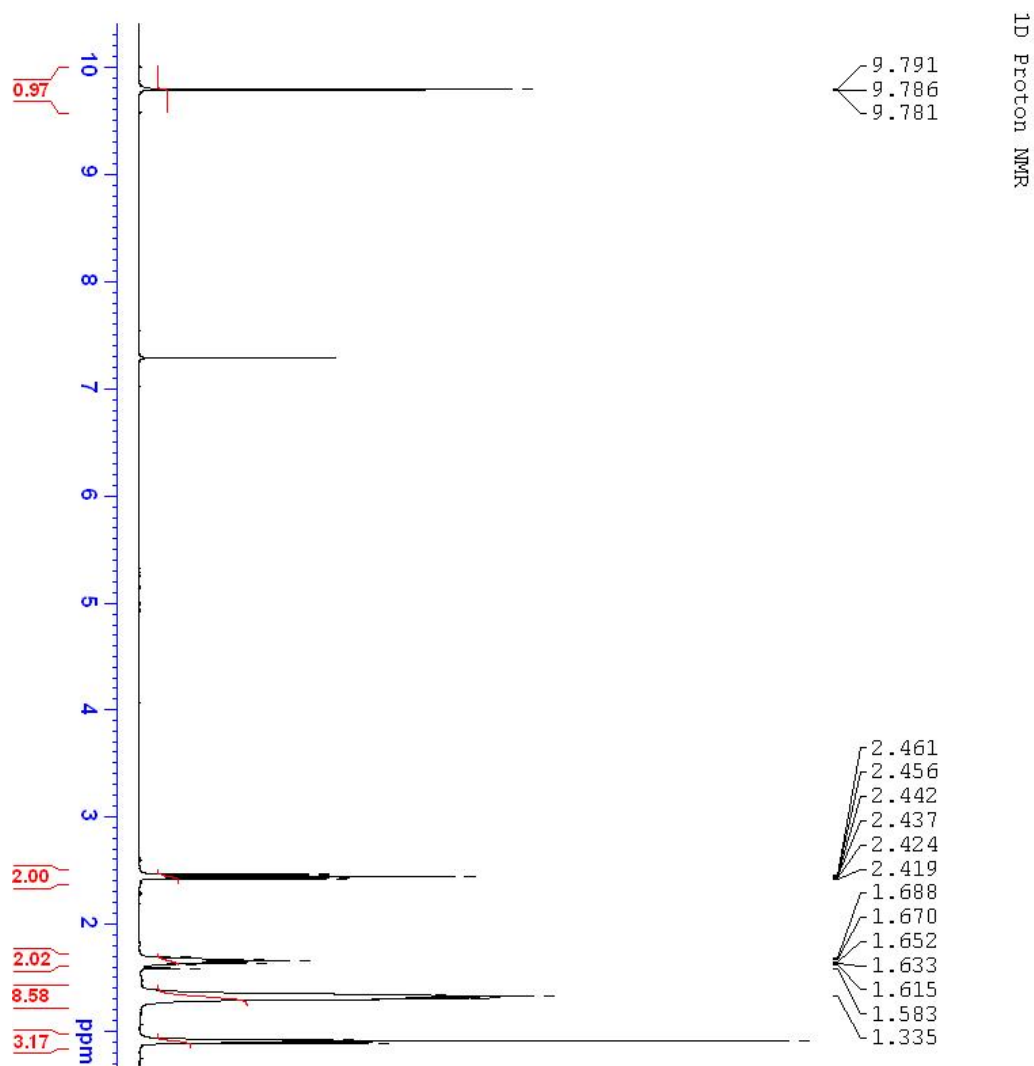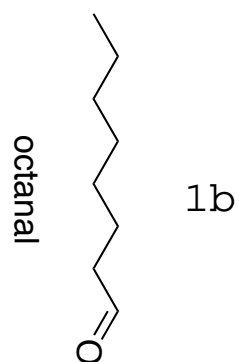

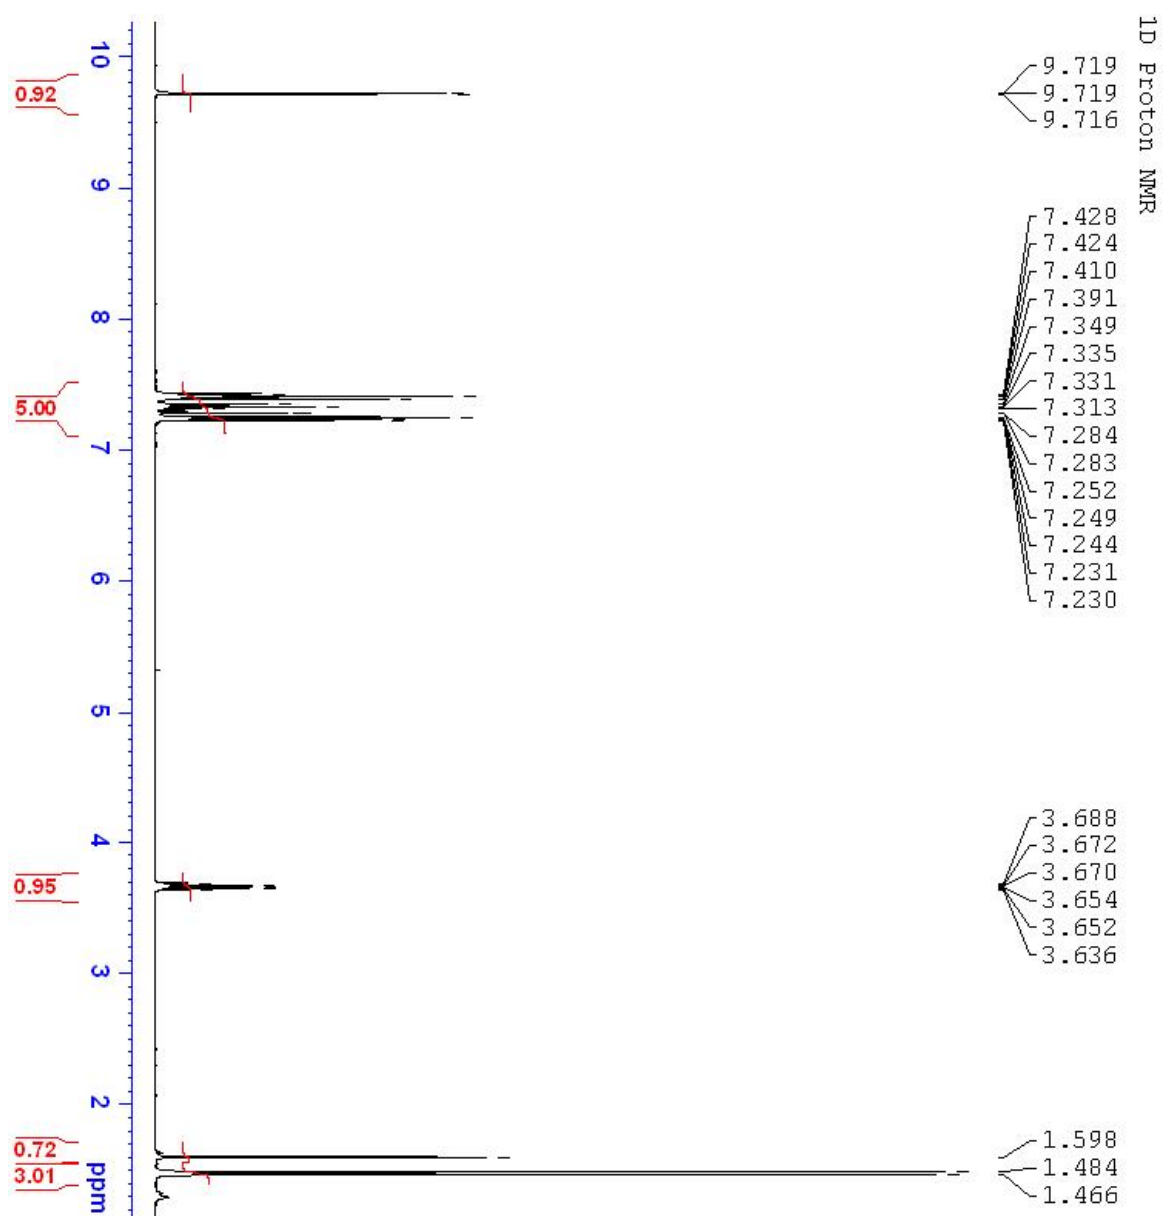

2-phenylpropanal

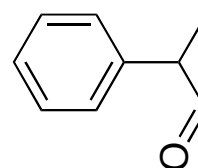

4b

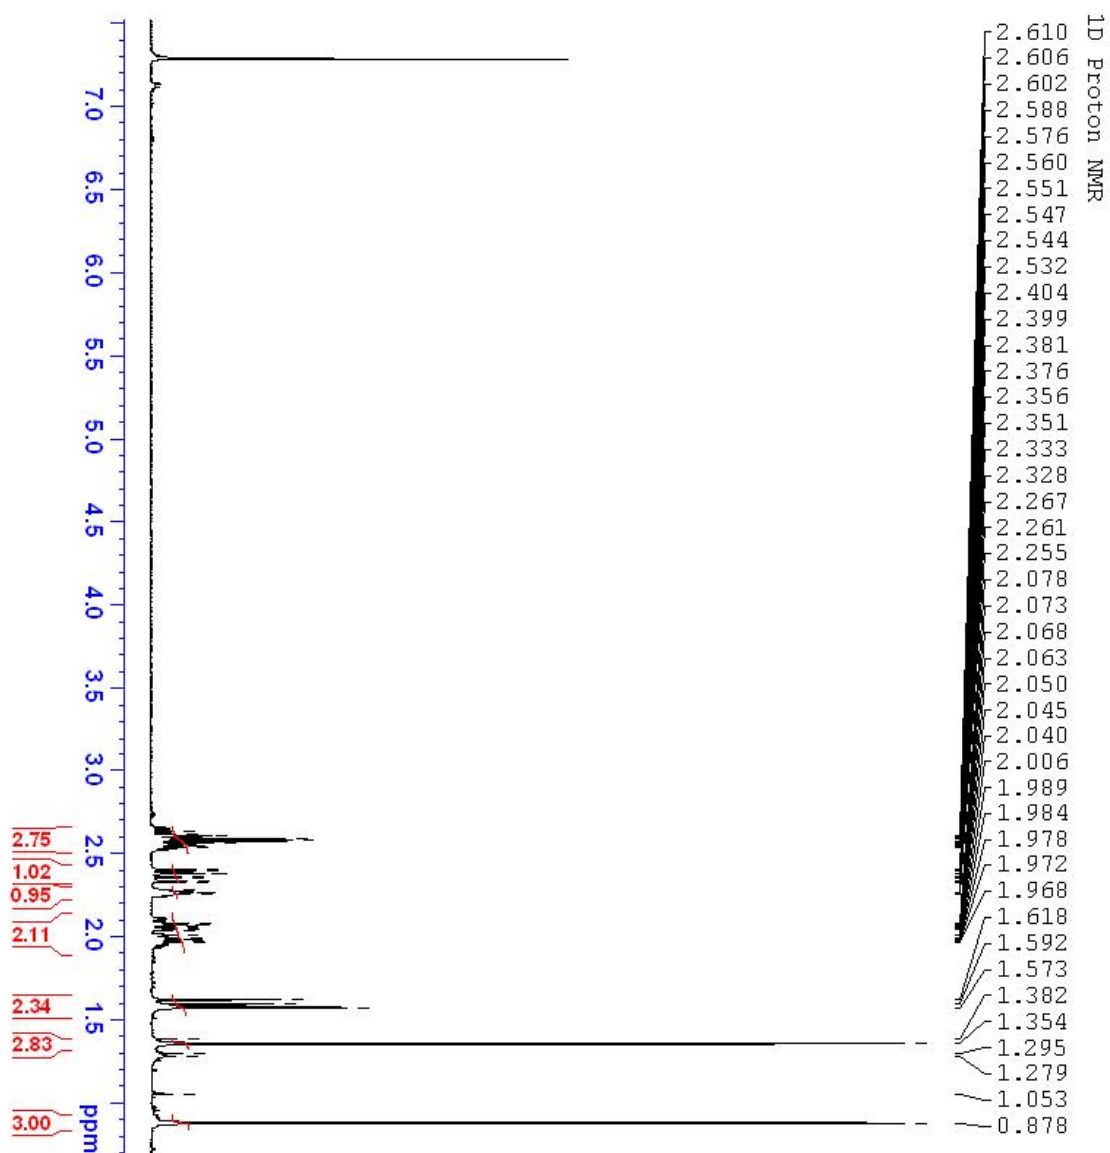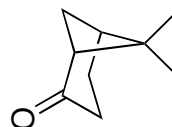

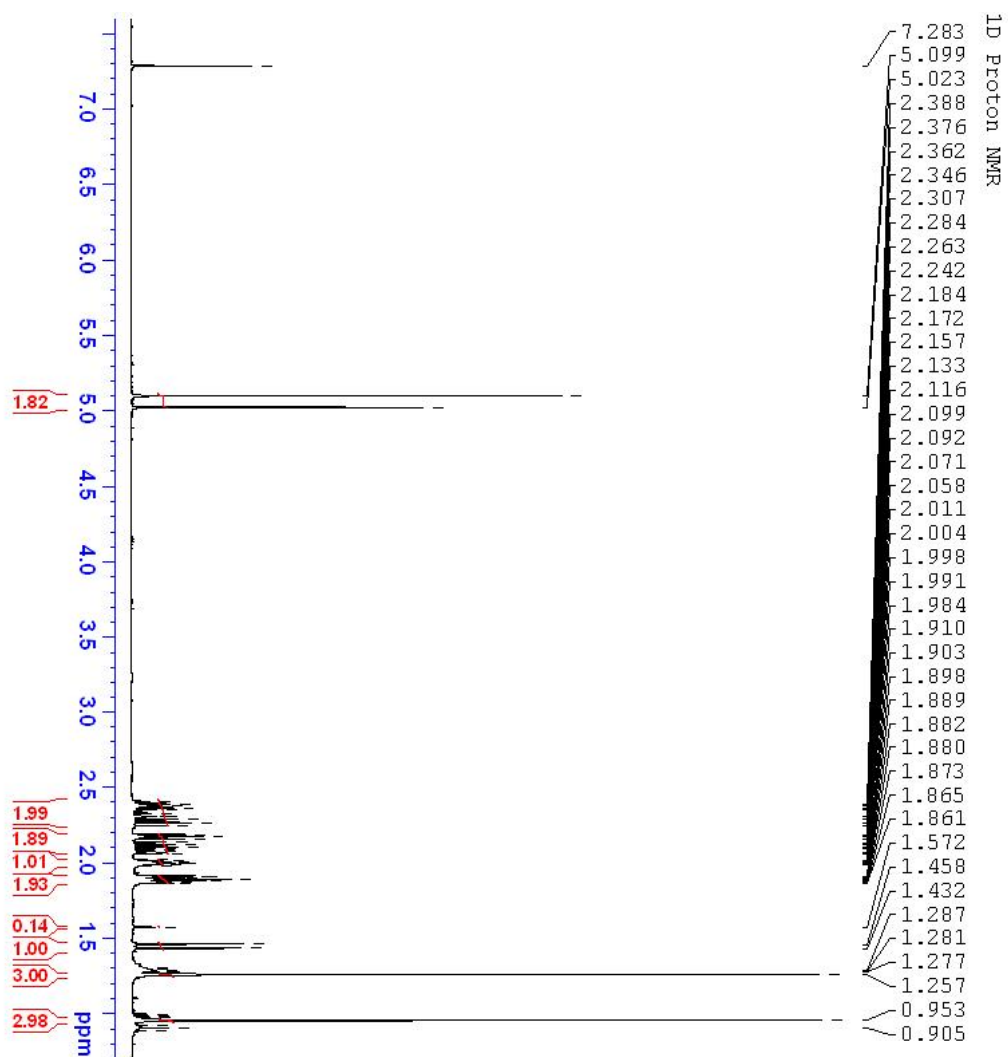



## Methyl 9-oxononanoate

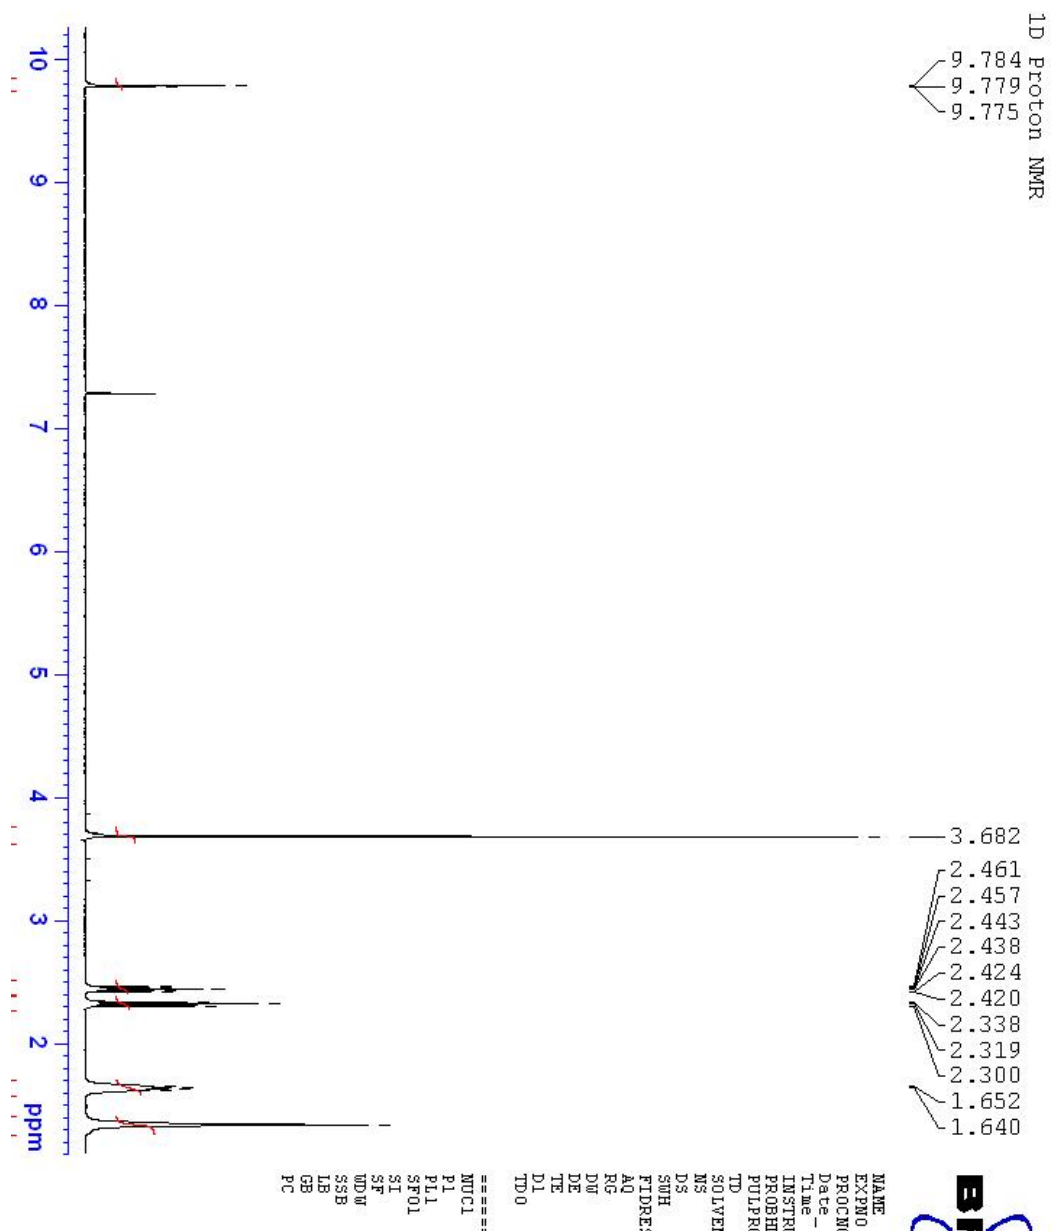

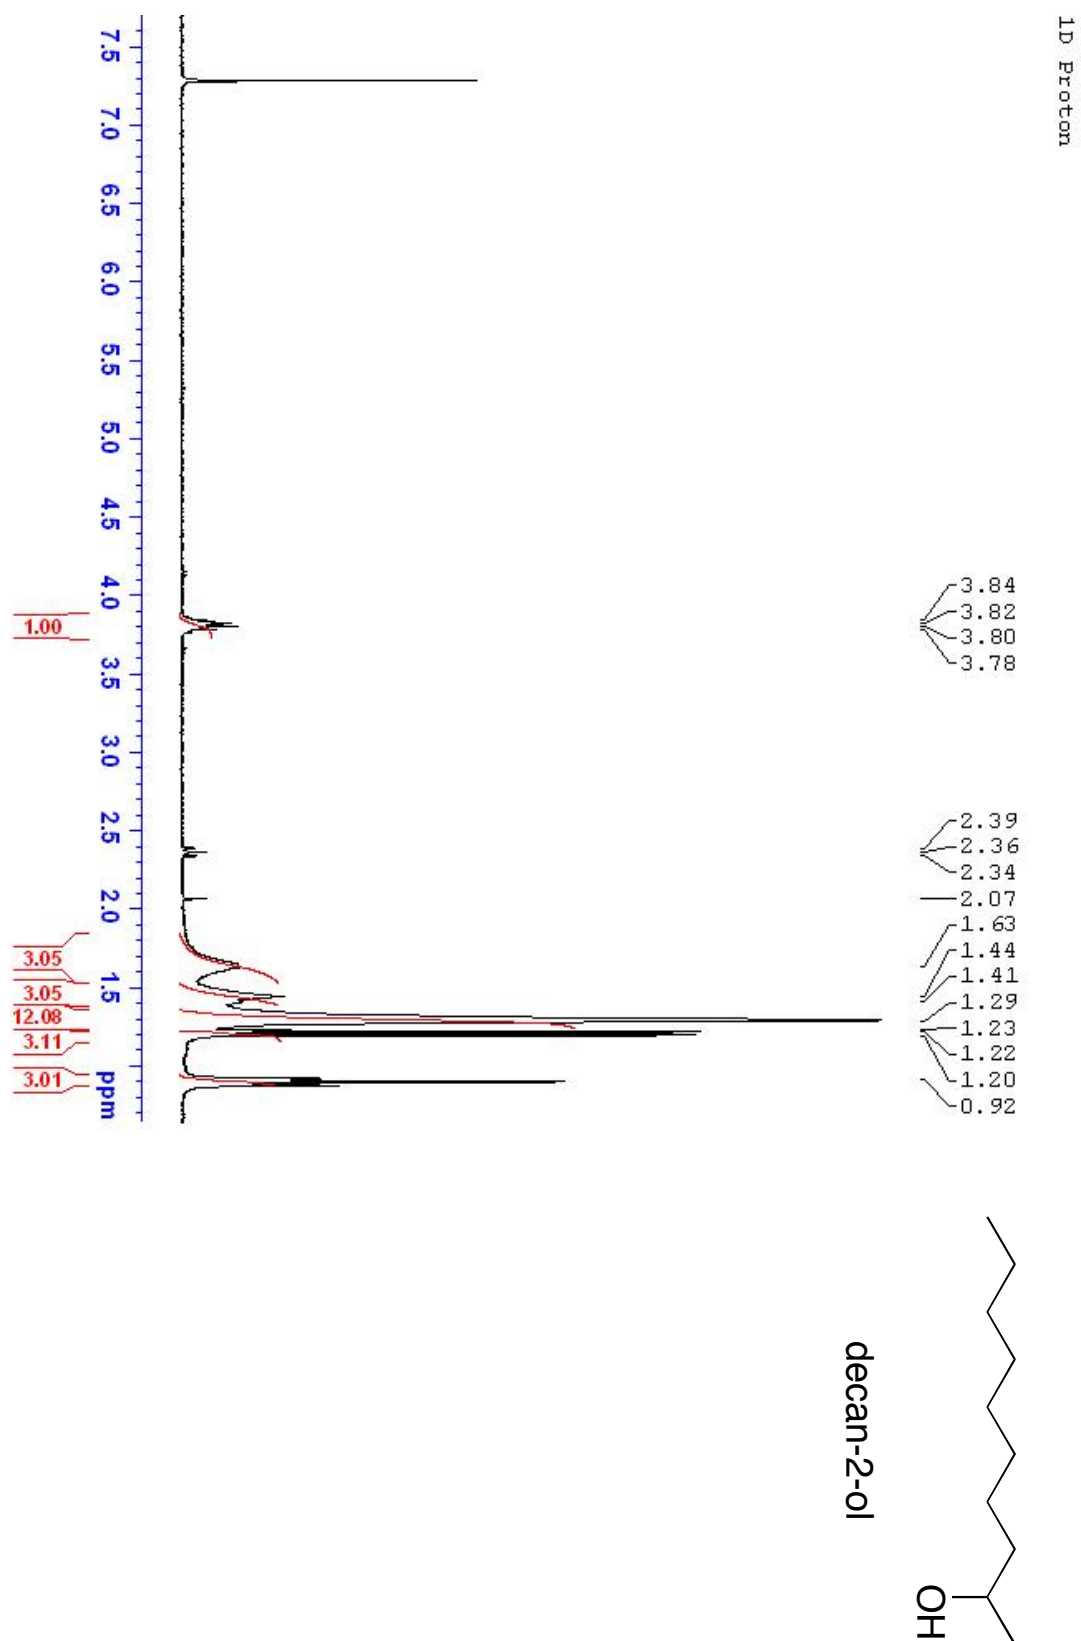

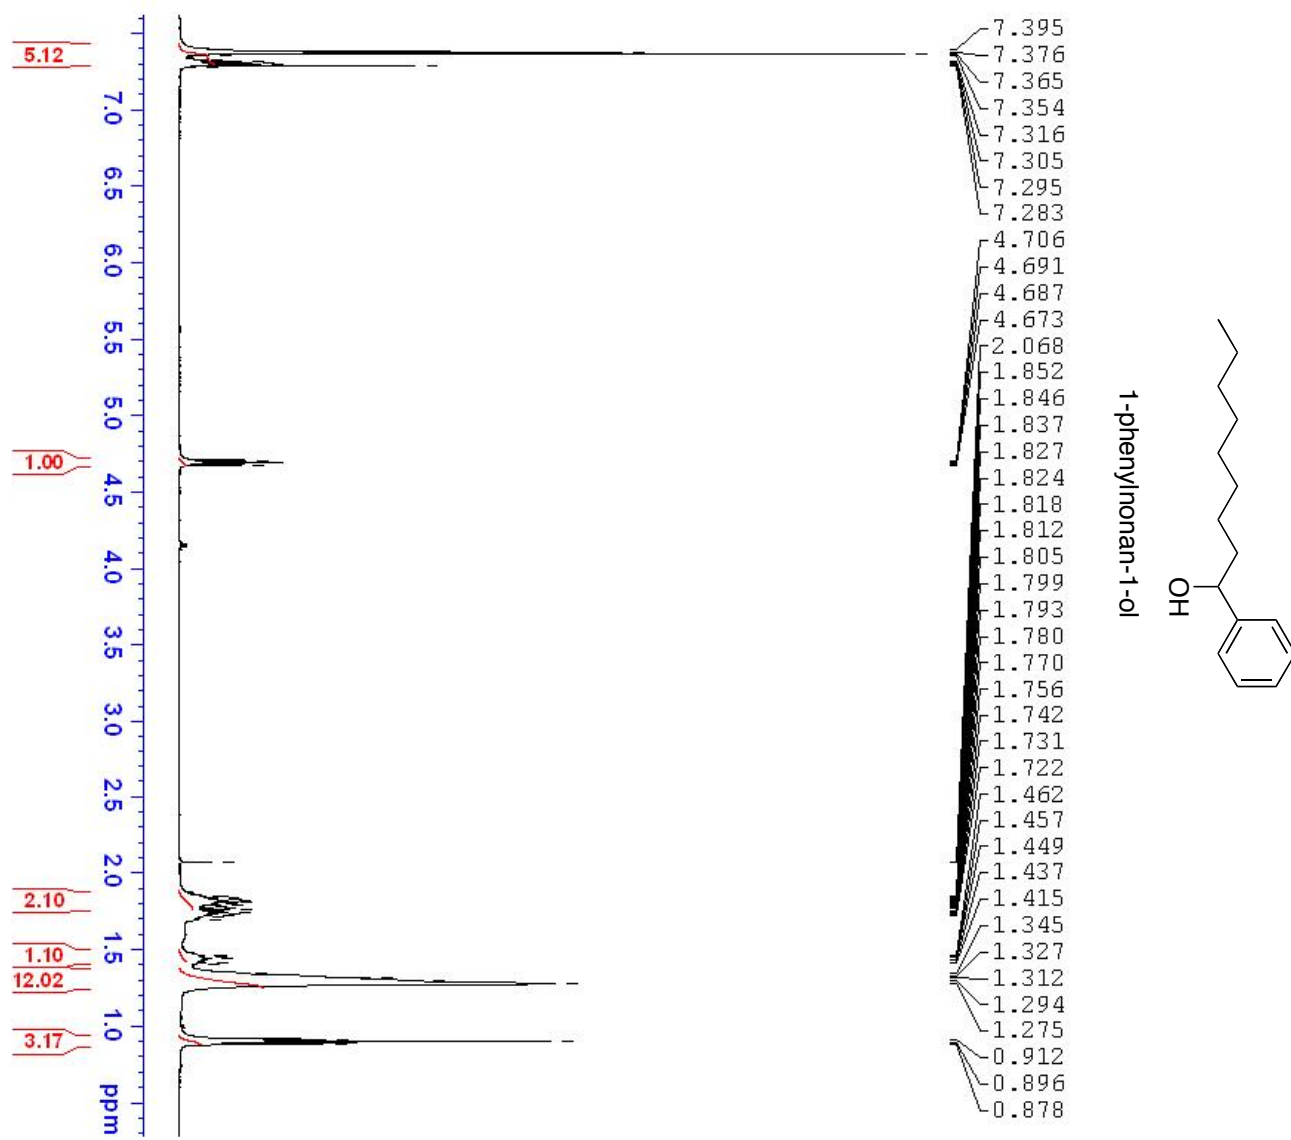

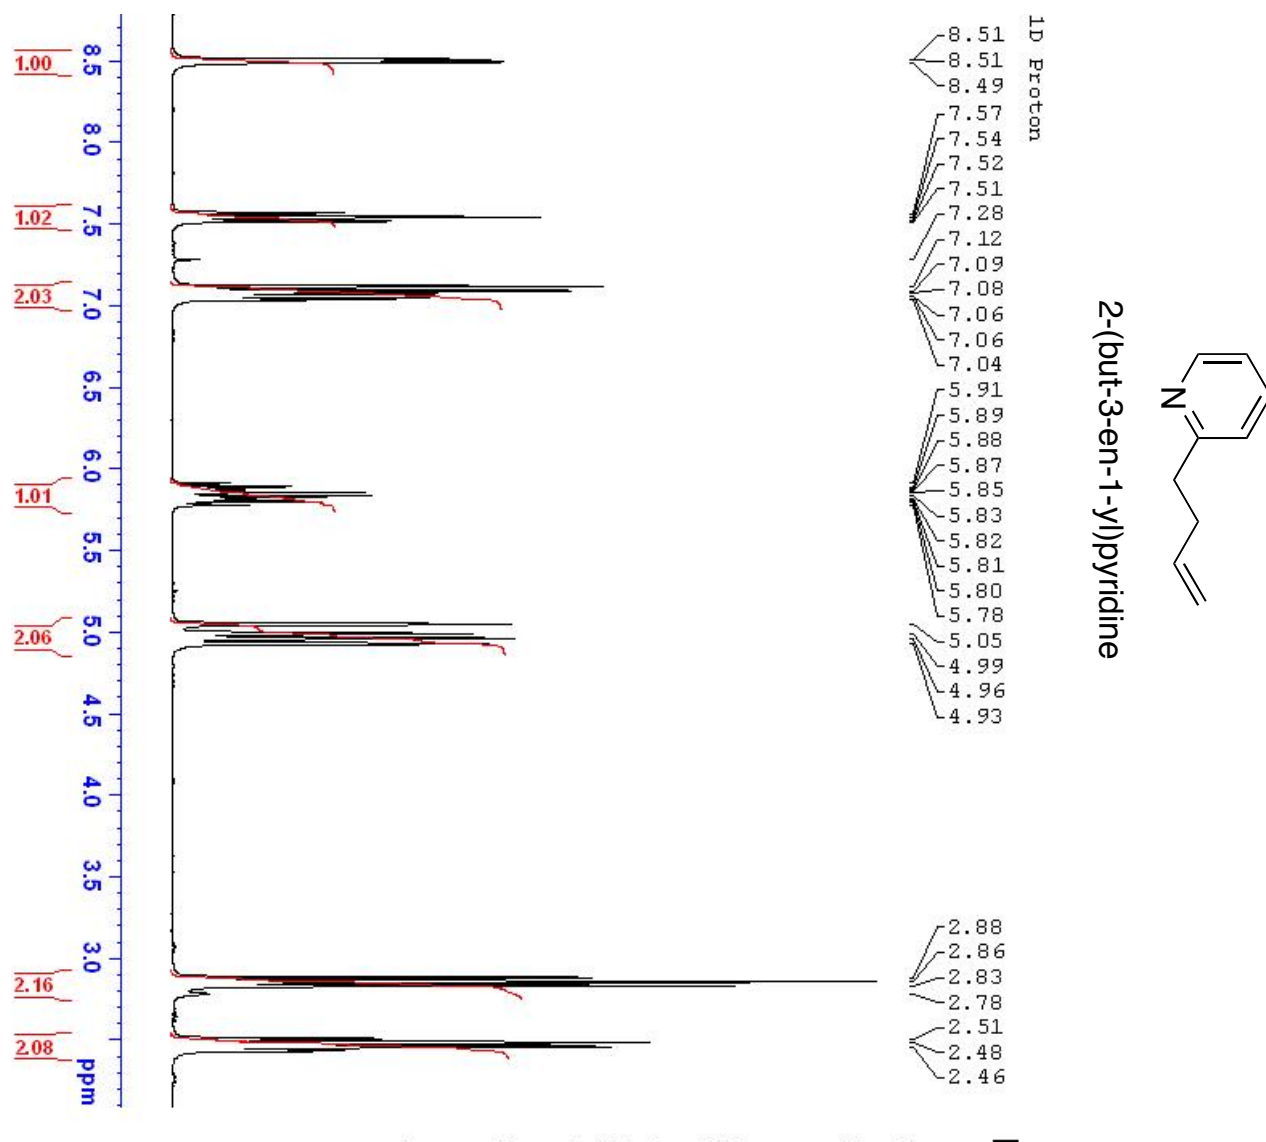

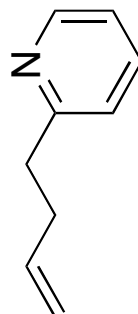

2-(but-3-en-1-yl)pyridine

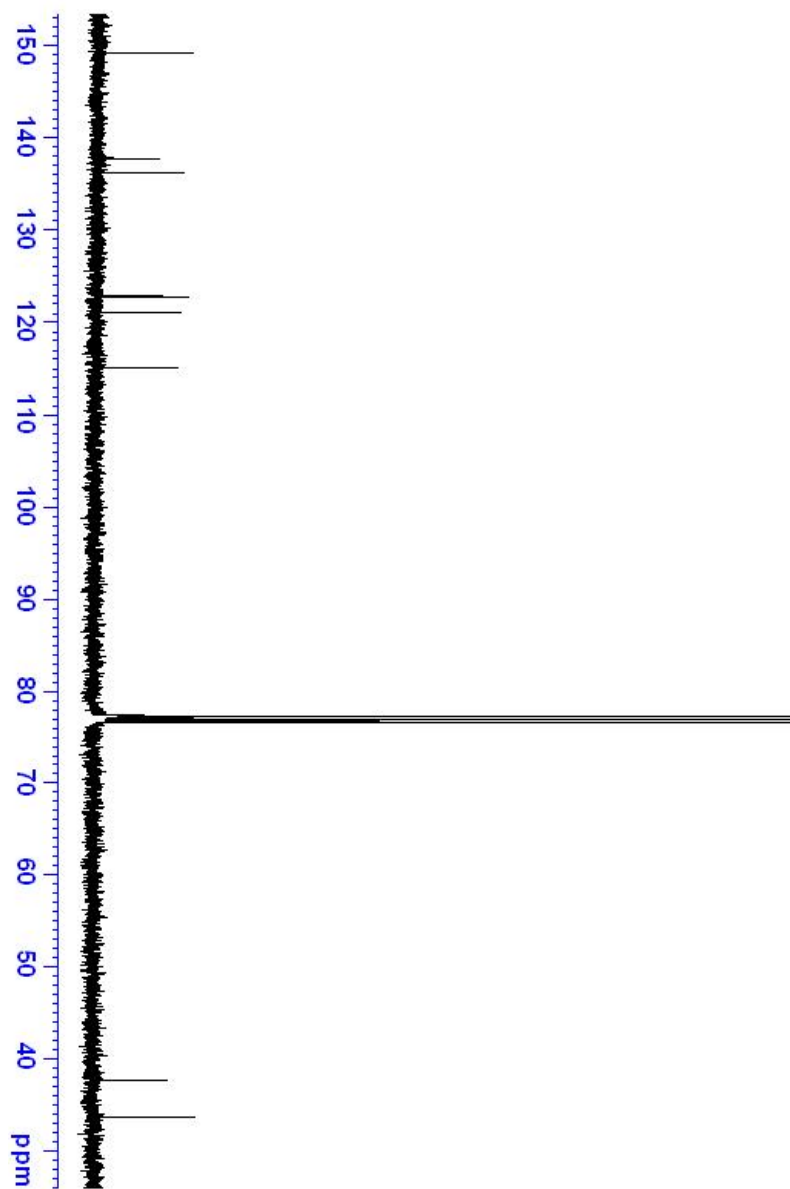

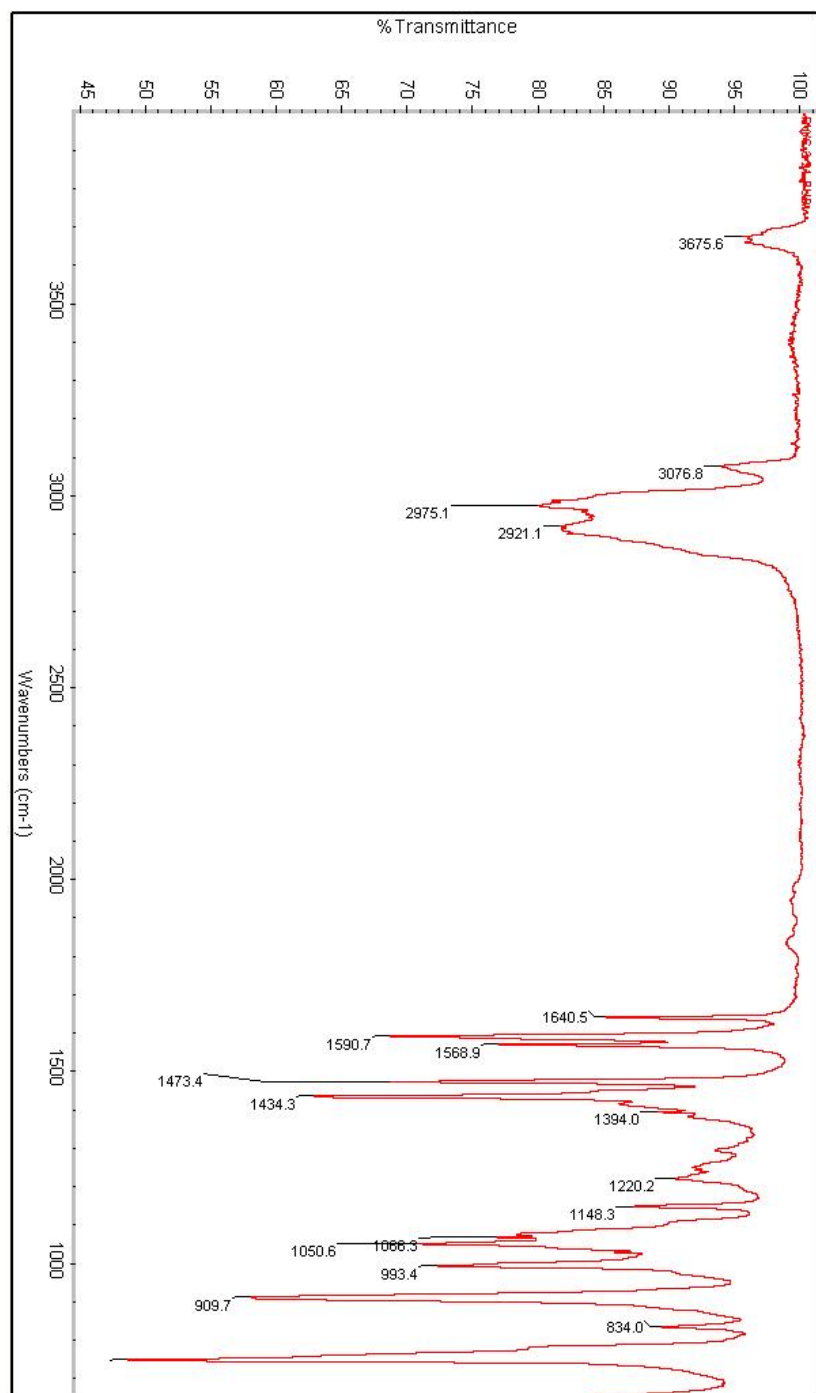

2-(but-3-en-1-yl)pyridine

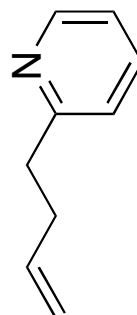

## References

---

- <sup>1</sup> Murphy, K. E.; Hoveyda, A. H. **2003**, *J. Am. Chem. Soc.* **125**, 4690.
- <sup>2</sup> Cren, S., Scha, P., Renaud, P. *J. Org. Chem.* **2009**, *74*, 2942
- <sup>3</sup> Rahim, A; Haruhiko, T.; Watanabe, M.; Fujiwara, T.; Takeda, T. *Tetrahedron Lett.* **1998**, *39*, 2153.
- <sup>4</sup> Tokunaga, M.; Shirogane, Y.; Aoyama, H.; Obora, Y.; Tsuji, Y. *J. Organomet. Chem.* **2005**, *690*, 5378.
- <sup>5</sup> Bae, H. J.; Jeong, W.; Lee, J.H.; Rhee, Y. H.; *Chem. Eur. J.* **2011**, *17*, 1433.
- <sup>6</sup> Yoshimitsu, T.; Nakatani, R.; Kobayashi, A.; Tanaka, T. *Org. Lett.* **2011**, *13*, 908.
- <sup>7</sup> Israeli, M.; Laing, D. K.; Pettit, L.D. *J. Chem. Soc., Dalton Trans.*, **1974**, 2194.
- <sup>8</sup> Smith, L. L.; Hill, F. L. *J. Chrom.* **1972**, *66*, 101.
- <sup>9</sup> Schiaffo, C. E; Dussault, P. H. *J. Org. Chem.* **2008**, *73*, 4688.
- <sup>10</sup> Jones, R. C. F.; Turner, I.; Howard, K. J *Tetrahedron Lett.*, **1993**, *34*, 6329
- <sup>11</sup> Boltukhina, E. V. *Tetrahedron Lett.*, **2011**, *67*, 5382.
- <sup>12</sup> Hoover, J.M.; Stahl, S.S. *J. Am. Chem. Soc.*, **2011**, *133*, 16901
- <sup>13</sup> Wertz, S. *Adv. Synth. Cat.* **2011**, *353*, 69.
- <sup>14</sup> Kamata, K., Yonehara, K., Nakagawa, Y., Uehara, K., Mizuno, N. *Nat. Chem.*, **2010**, *2*, 478; Landers, B., Bernini, C., Wang, C., Navarro, O. *J. Org. Chem.* **2011**, *76*, 1390.
- <sup>15</sup> Wang, Z., Li, M., Jia, J., Wang, F., Xue, S. *Tetrahedron Lett.*, **2011**, *52*, 5968.
- <sup>16</sup> Schaffer, G.W., Boerr, A.B., Purzycki, K.L. *J. Org. Chem.*, **1972**, *37*, 25.
- <sup>17</sup> Greisbaum, K.; Miclaus, V.; *Environ. Sci. Technol.* **1998**, *32*, 647.
- <sup>18</sup> Nakamura, K.; Matsuda, T. *J. Org. Chem.*, **1998**, *63*, 8957.
- <sup>19</sup> Kose, O.; Saito, S. *Org. Biomol. Chem.* **2010**, *8*, 896.
